# Supplementary material for: FOXO1 in the ventromedial hypothalamus regulates energy balance
Source: JCI journal article supplement (doi:10.1172/jci62848), 2012-06-01
Supplement: sd1 [file 1]

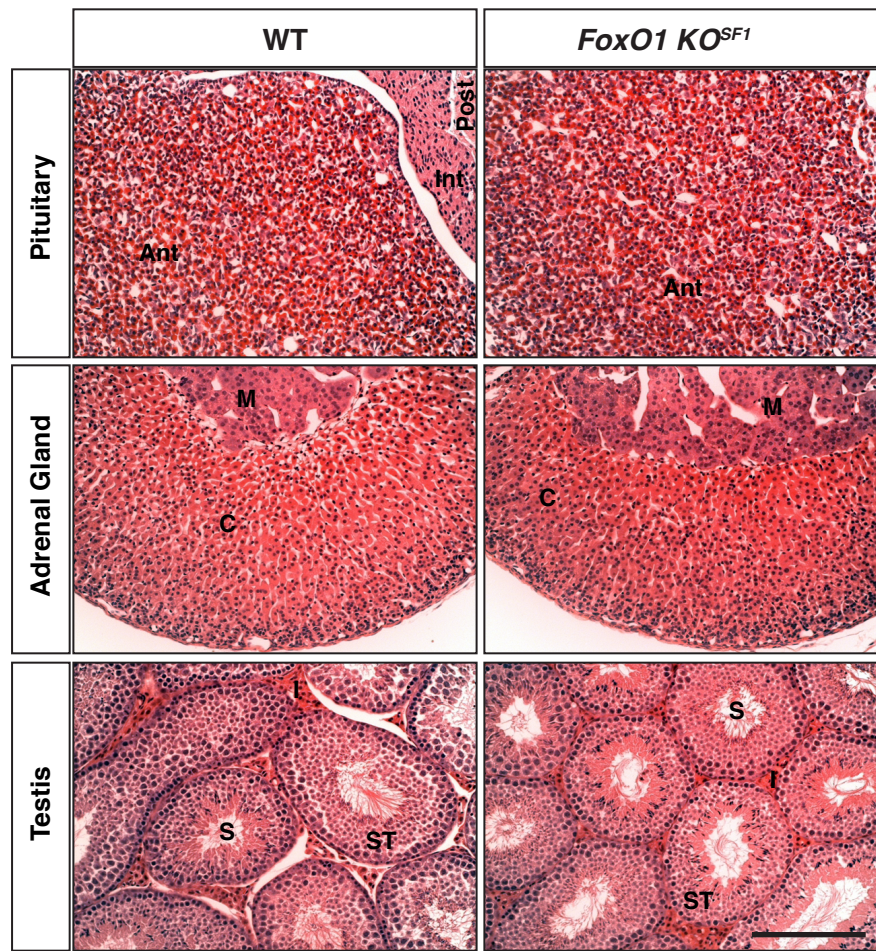

**Supplementary Figure 1. Histology of pituitary gland, adrenal gland, and testis.**

Sections from the indicated tissues from WT and *FoxO1*  $KO^{SF1}$  mice were analyzed using hematoxylin and eosin (H&E) staining. Ant, anterior lobe. Int, intermediate lobe. Post, posterior lobe. C, cortex. M, medulla. I, interstitium. S, spermatozoa. ST, seminiferous tubules. Scale bar = 200um.

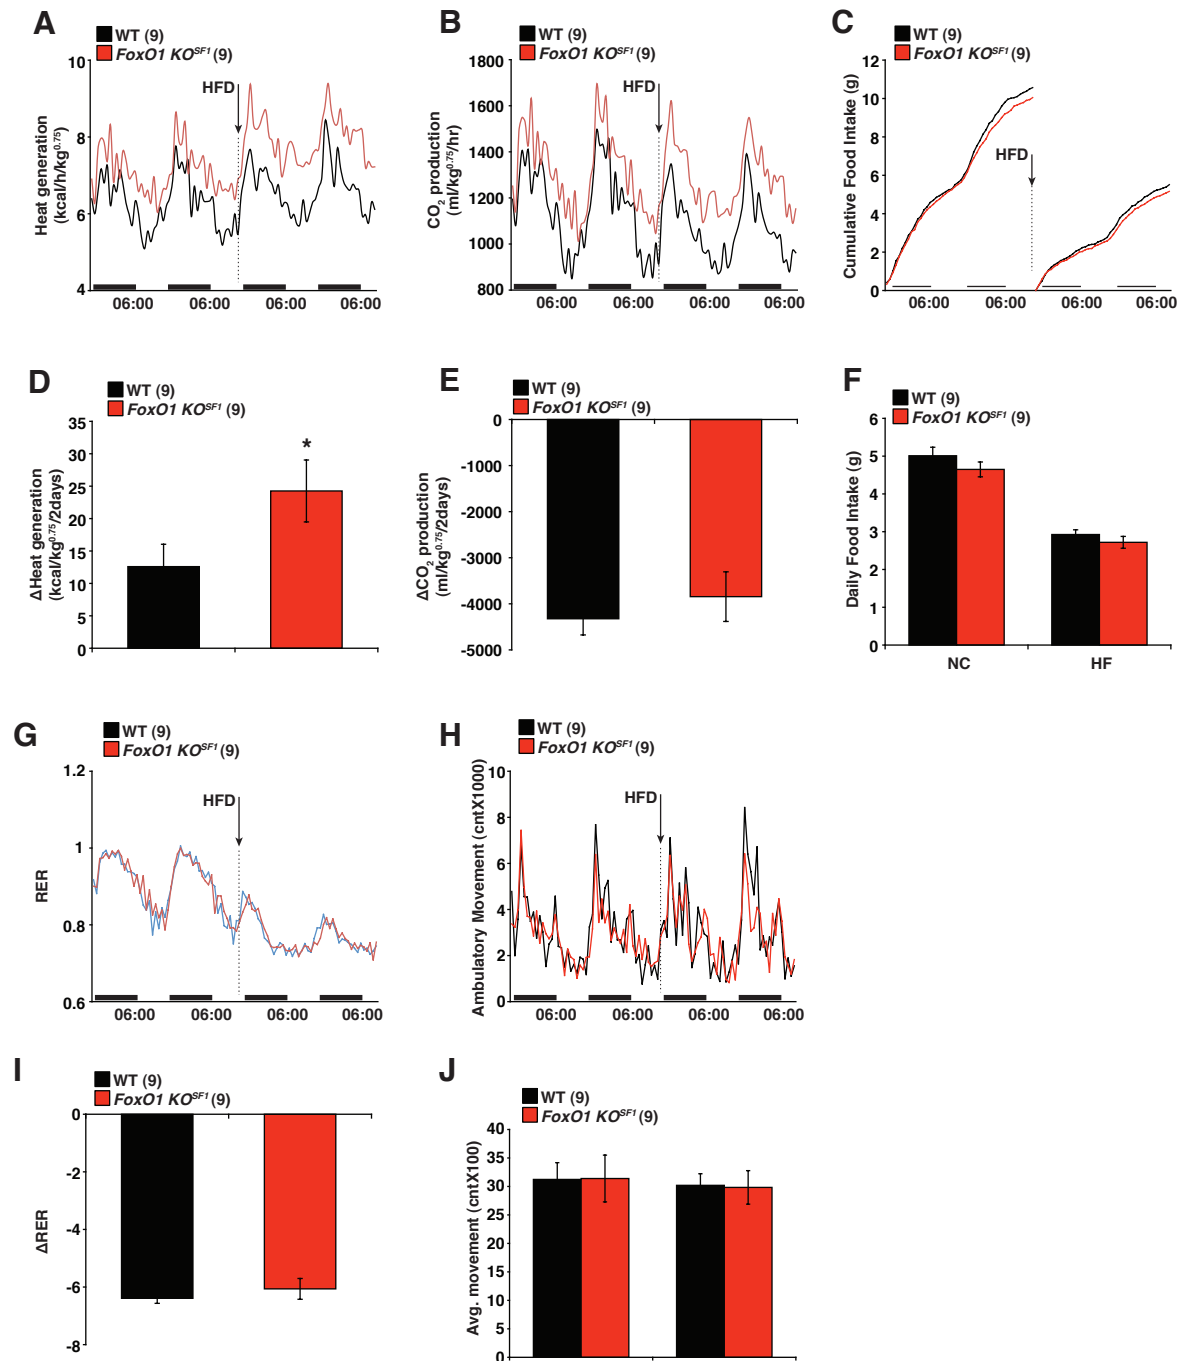

**Supplementary Figure 2. Effect of acute high fat diet on metabolic parameters in WT and *FoxO1* KO<sup>SF1</sup> mice.**

Temporal changes of **(a)** heat generation, **(b)** CO<sub>2</sub> production, and **(g)** RER. Changes in **(d)** heat generation, **(e)** CO<sub>2</sub> production, and **(i)** RER between 2 days before and after HFD. **(c)** Cumulative food intake and **(f)** daily food intake between genotypes. **(h)** Ambulatory movement and **(j)** average in total movement. Numbers of animals examined are expressed in parenthesis in each graph. The data are expressed as either average **(a-c, g, h)** or mean±SEM (\*P<0.05, Student's t-test). cnt, beam breaks counts.

**Supplementary Table 1**  
**Effect of FoxO1 KO in the VMH on biochemical parameters**

| Parameter                       | WT                | <i>FoxO1</i> KO <sup>SF1</sup> | Age (wks) | Bleeding Time |
|---------------------------------|-------------------|--------------------------------|-----------|---------------|
| Basal Corticosterone (ng/ml)    | 52.82±6.16 (6)    | 51.02±8.15 (5)                 | 6-7       | 12:00-12:30   |
| Basal Corticosterone (ng/ml)    | 46.58±10.43 (6)   | 44.82±9.03 (4)                 | 5         | 08:00-08:30   |
| Stressed Corticosterone (ng/ml) | 118.82±27.18 (7)  | 120.76±30.47 (5)               | 5         | 08:00-08:30   |
| Testosterone (ng/dl)            | 114.67±18.11 (9)  | 116.20±22.72 (7)               | 13-16     | 14:00-15:30   |
| FSH (ng/ml)                     | 185.89±25.51 (10) | 162.31±26.60 (6)               | 13-16     | 14:00-15:30   |
| LH (ng/ml)                      | 0.97±0.38 (10)    | 0.82±0.36 (5)                  | 13-16     | 14:00-15:30   |
| T3 (ng/ml)-Fed                  | 0.82±0.07 (9)     | 0.74±0.07 (8)                  | 7-9       | 14:00-15:30   |
| T3 (ng/ml)-Fasted (24hrs)       | 0.45±0.07 (10)    | 0.41±0.1 (6)                   | 7-10      | 14:00-15:30   |
| T4 (ng/ml)-Fed                  | 12.76±1.16 (9)    | 10.67±1.2 (8)                  | 7-9       | 14:00-15:30   |
| T4 (ng/ml)-Fasted (24hrs)       | 4.34±0.65 (10)    | 5.48±1.25 (6)                  | 7-10      | 14:00-15:30   |

The data were expressed as mean±SEM and numbers of experimental animals were indicated in parenthesis.  
No statistical significance was detected between genotypes.

**Supplementary Table 2**  
**Body length in various food conditions**

|                          | WT             | <i>FoxO1</i> <i>KO</i> <sup>SF1</sup> | Age (wks) |
|--------------------------|----------------|---------------------------------------|-----------|
| Male, normal chow (cm)   | 9.36±0.05 (10) | 9.38±0.05 (9)                         | 10        |
| Female, normal chow (cm) | 9.34±0.05 (10) | 9.4±0.04 (8)                          | 17-18     |
| Male, high fat (cm)      | 9.67±0.09 (8)  | 9.85±0.12 (6)                         | 11-12     |
| Female, high fat (cm)    | 9.02±0.21 (6)  | 9.15±0.21 (4)                         | 12-13     |

The data were expressed as mean±SEM and numbers of experimental animals were indicated in parenthesis.  
No statistical significance was detected between genotypes.
